# Supplementary material for: Engineering the vertical concentration distribution within the polymer:fullerene blends for high performance inverted polymer solar cells
Source: Royal Society of Chemistry journal article supplement (doi:10.1039/c6ta10678a), 2016-12-21
Supplement: c6ta10678a1.pdf [file c6ta10678a1.pdf]

## Supporting information

### Engineering the vertical concentration distribution within the polymer:fullerene blends for high performance inverted polymer solar cells

Yaping Wang, Honglu Zhu, Zhenzhen Shi, Fuzhi Wang, Bing Zhang, Songyuan Dai, and Zhan'ao Tan\*

State Key Laboratory of Alternate Electrical Power System with Renewable Energy Sources, Beijing Key Laboratory of Novel Thin Film Solar Cells, North China Electric Power University, Beijing 102206, China.

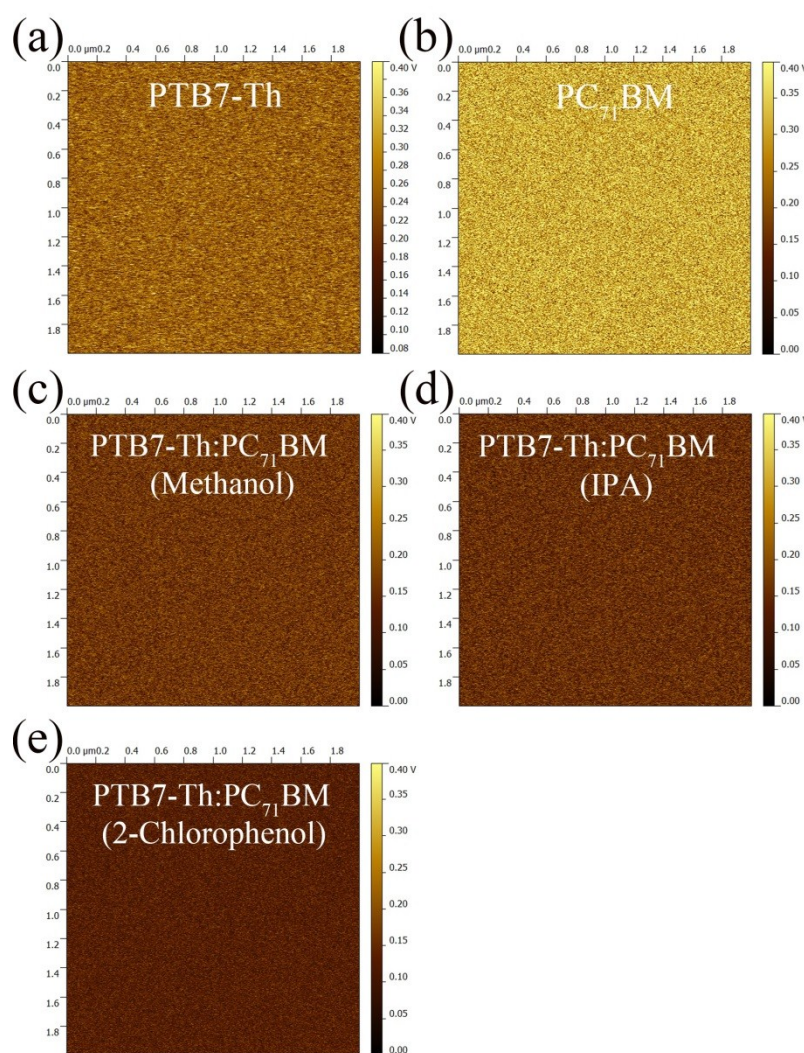

**Fig. S1.** Surface potential of (a) PTB7-Th film, (b) PC<sub>71</sub>BM film, and PTB7-Th:PC<sub>71</sub>BM film with (c) methanol, (d) IPA and (e) 2-Chlorophenol (IPA) flush treatment.

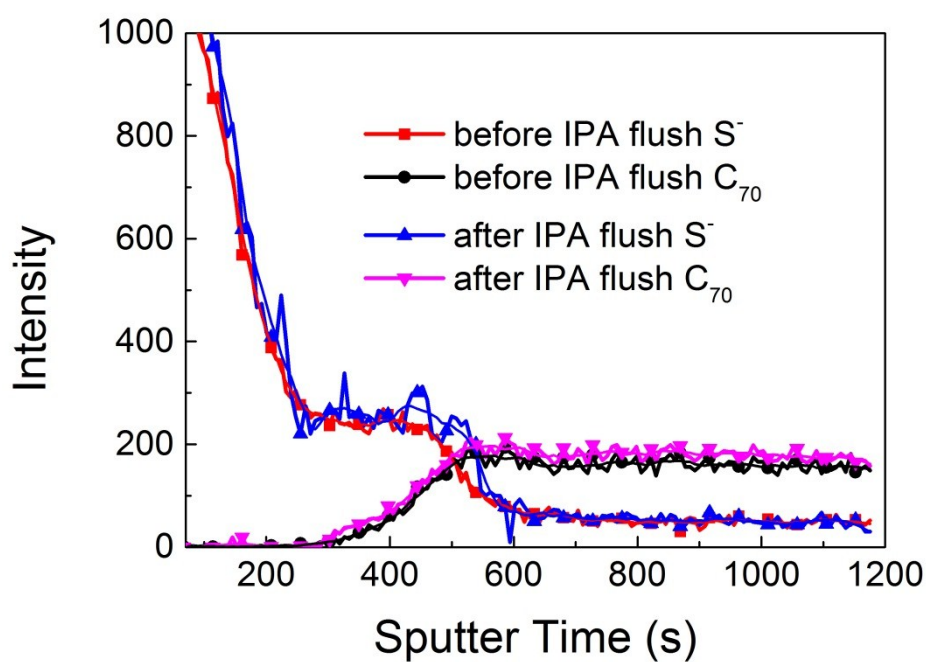

**Fig. S2.** TOF-SIMS curve of PTB7-Th:PC<sub>71</sub>BM film before and after IPA flush treatment.

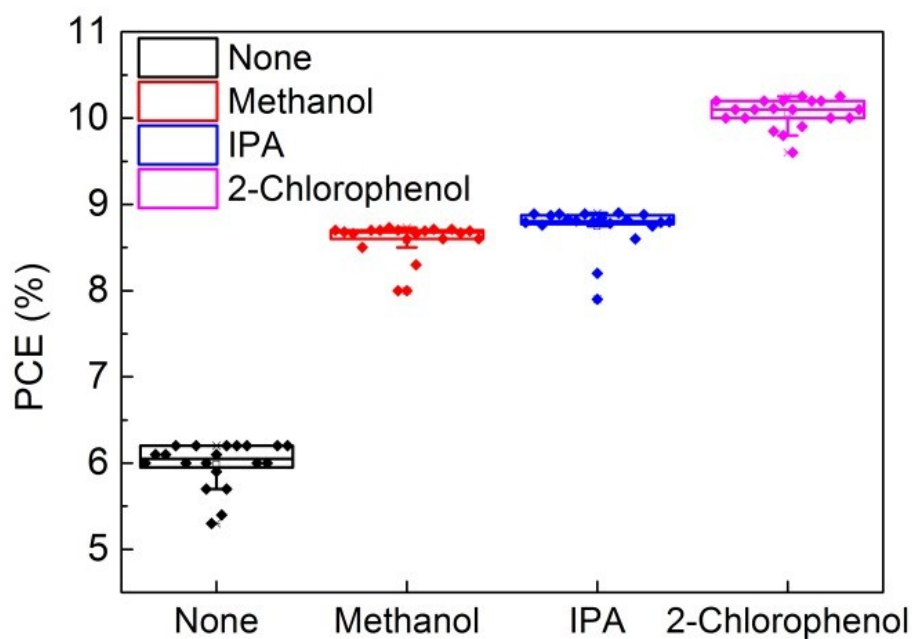

**Fig. S3.** Statistical PCE of 20 individual devices with none, methanol, IPA and 2-Chlorophenol (IPA) flush treatment.

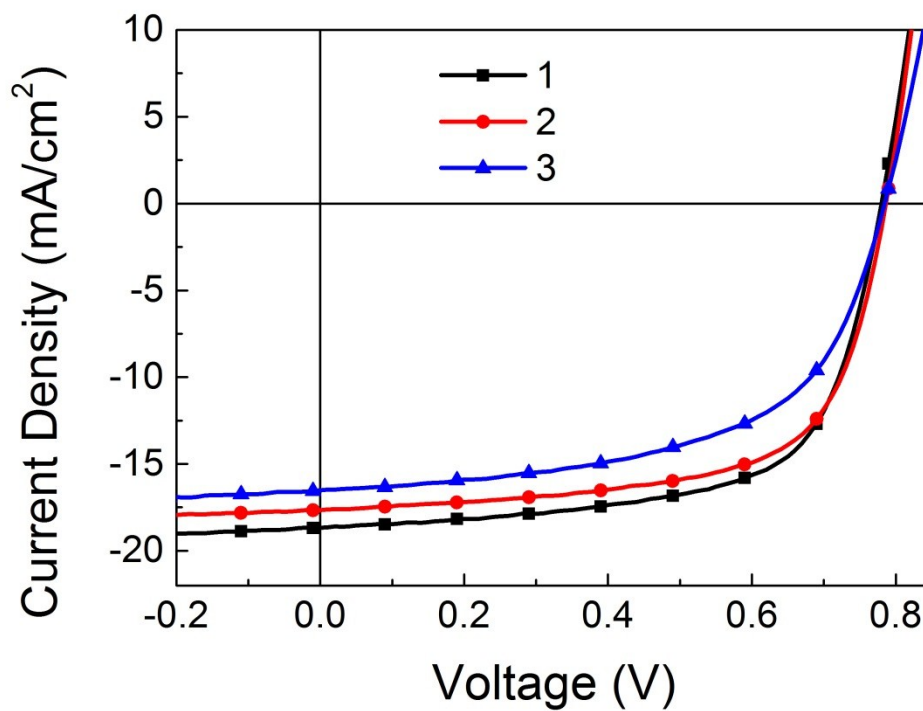

**Fig. S4.**  $J$ - $V$  curves of devices flushed with the best concentration (0.2%) of 2-Chlorophenol for different times

**Table S1.** Summary of performance parameters of devices flushed with the best concentration (0.2%) of 2-Chlorophenol for different times

| Flush times | $J_{sc}$ (mA/cm <sup>2</sup> ) | $V_{oc}$ (V) | FF (%) | PCE (%) |
|-------------|--------------------------------|--------------|--------|---------|
| 1           | 18.50                          | 0.786        | 69.80  | 10.15   |
| 2           | 18.15                          | 0.780        | 66.25  | 9.51    |
| 3           | 17.66                          | 0.786        | 65.26  | 9.06    |
